# 1 DEVELOPMENT OF A COMPLEX INTERVENTION PACKAGE FOR DENGUE

## 2 PREVENTION

3 **R. M. Nayani Umesha Rajapaksha**<sup>1</sup> [MBBS, MD]

4 Chrishantha Abeysena<sup>2</sup> [MBBS, MD]

5 Aindralal Balasuriya<sup>3</sup> [MBBS, MD]

6 Nimalka Pannila Hetti<sup>4</sup> [MBBS, MD]

7 Ajith Alagiyawanna<sup>5</sup> [MBBS, MD]

8 Suranga Manilgama<sup>6</sup> [MBBS, MD]

9 <sup>1</sup> Senior Registrar in Community Medicine, Ministry of Health, Colombo, Sri Lanka

10 <sup>2</sup> Senior Professor in Community Medicine, Department of Community Medicine, Faculty of  
11 Medicine, Ragama, University of Kelaniya, Sri Lanka

12 <sup>3</sup> Associate Professor, Consultant Community Physician, General Sir John Kotelawala Defence  
13 University, Ratmalana, Sri Lanka

14 <sup>4</sup> Consultant Community Physician, National Dengue Control Unit, Ministry of Health, Colombo, Sri  
15 Lanka

16 <sup>5</sup> Consultant Community Physician, Health Promotion Bureau, Ministry of Health, Colombo, Sri  
17 Lanka

18 <sup>6</sup> Consultant General Physician, Teaching Hospital Kurunegala, Sri Lanka

### 19 **Corresponding Author:**

20 Dr. R. M. Nayani Umesha Rajapaksha: Address: No.157, Jayanthipura, Kurunegala, Sri Lanka.

21 E-Mail: [drnayani2020@gmail.com](mailto:drnayani2020@gmail.com) or [28048@pgim.cmb.ac.lk](mailto:28048@pgim.cmb.ac.lk)

22 ORCID ID: <https://orcid.org/0000-0002-4641-903X>

24 **Keywords:** "dengue", "communication", "behaviour"; "waste management", "COMBI"

25 **Word count:** 3469

## 26 **ABSTRACT**

27

### 28 **Introduction**

29 Complex interventions are widely used in public health practices. Communication for  
30 Behavioural Impact (COMBI) is an effective method in planning for dengue control. The aim  
31 was to develop an intervention package to change behaviour to prevent dengue in a dengue  
32 endemic area of Sri Lanka.

### 33 **Methods**

34 Development of the intervention package was formulated according to two-phases including  
35 ‘Theoretical phase’ and ‘Modelling phase’ using a framework. World Health Organization 10  
36 key steps in planning COMBI were followed in order to develop the present intervention  
37 package. A Situational-Market-Analysis-for-Communication-Keys (SMACK) was conducted  
38 in highest dengue endemic area in Kurunegala district to identify the Specific Behavioural  
39 Objectives (SBOO), which was conducted using mixed methodological approach followed by  
40 other steps of COMBI planning.

### 41 **Results**

42 The overall goal was to decrease morbidity and mortality due to dengue illness. The SBOO  
43 for the plan were to improve the proper waste management practices according to the ‘3R  
44 concept’ (Reduce-Reuse-Re-cycling) and to improve the dengue prevention practices by 30  
45 minutes of weekly cleaning. The strategies were to conduct a community empowerment  
46 program to improve waste management and weekly practices on dengue prevention by  
47 conducting administrative mobilization and public-relationship, public-advocacy, community  
48 mobilization, personal selling, advertising, and point of service promotion. The plan was  
49 finalized after taking expert opinion with the participation of stakeholders by the  
50 management team.

### 51 **Conclusion**

52 Developing a COMBI plan for an area after the identification of SBOO would be feasible to  
53 implement in order to empower the community to prevent dengue and improve community  
54 health services.

55

56

57

58

## 59 Introduction

60 Dengue is a major health problem affecting mainly the tropical countries. Many strategies  
 61 have been employed to tackle the outbreaks, but the key components of outbreak response are  
 62 household and community level behavioural and social interventions. Moreover, leadership  
 63 and planning for sustainable community participation, transfer of technical knowledge and  
 64 skills in planning, and measures to ensure sustainability at each level are identified as key  
 65 issues in dengue prevention. However, behavioural change is important in effective  
 66 implementation of control activities to prevent and control dengue. Many community-based  
 67 dengue control programmes focus only to improve knowledge and to increase awareness  
 68 assuming that changing behaviours,[1].

69 Complex interventions are widely used in public health practices. Main three stages can be  
 70 identified in the development of complex intervention, [2-4]. Moreover, systematically used  
 71 theory to develop the intervention, fully description of the intervention will help to  
 72 implement properly for the purposes of the evaluation. Importantly, the developed  
 73 intervention needs to be replicated by others. The behavioural interventions would be focused  
 74 on identifying key risk reduction actions at the household and community level to minimize  
 75 negative health consequences. Moreover, application of multiple approaches is essential to be  
 76 included to achieve the success to ensure community-located outbreak prevention through  
 77 achieving specific behavioural results,[5]. A systematic review revealed that community  
 78 mobilization programmes are effective interventions in reducing *Aedes aegypti* entomological  
 79 indices,[6]. Notably, multi-stakeholder partnership leads to achieve successful outcomes of  
 80 the interventions. Furthermore, the importance of incorporating health education and capacity  
 81 building for the development of the programmes to prevent communicable disease is  
 82 highlighted,[7]. Therefore, there is a need to empower the community through multi-  
 83 stakeholder participation to achieve sustainable solution for dengue prevention and all steps

84 to be taken to minimize the dengue burden by changing behaviour of the community  
85 members. Importantly, systematic development of a complex intervention with minimum risk  
86 of bias is currently needed and it needs to be culturally and geographically suited.

87 Communication for Behavioural Impact (COMBI) is defined as a methodological process  
88 which blends strategically blends a variety of communication interventions intended to  
89 engage individuals and families in adopting and maintaining healthy behaviours and  
90 maintaining those behaviours. It uses a managerial view to plan social mobilization and  
91 communication for behavioural impact on public health. The importance of social  
92 mobilization for prevention and control of dengue has gathered pace internationally in recent  
93 years. Further, COMBI planning offers a comprehensive and innovative managerial insight to  
94 planning social mobilization and communication for behavioural impact which is intended  
95 for programme managers in integrating interventions to effectively manage dengue.  
96 Moreover, to ensure sustainable dengue prevention, the COMBI plans should address the  
97 various at-risk populations and it needs to be adopted culturally,[8].

98 There is a lack paucity of studies with scientifically developed intervention packages for  
99 dengue prevention. In this backdrop, to prevent the occurrence of dengue outbreaks, the  
100 behaviour of the community needs to be changed. Thus, the development of an intervention  
101 for the prevention of dengue based on evidence is a timely need. Importantly, the results of  
102 this study would enable responsible authorities to strengthen control strategies to improve  
103 dengue prevention activities and it will generate a greater interest to develop capacities for  
104 dengue management and would enable them to take action to minimize the impact due to  
105 disease burden. The aim was to develop a complex intervention package to change the  
106 behaviour of the householders for dengue prevention in Kurunegala district, Sri Lanka.

## 107 **Methods**

A complex intervention process was formulated according to 2008 guide and modified with the revised framework of ‘Developing and Evaluating Complex Interventions: New Guidance’,[2-4]. This framework provides a guideline for using a stepped approach which separates different elements and using the probable active component in developing the intervention. The development of the intervention package was formulated according to the two phases including ‘Theoretical phase’ and ‘Modelling phase’.

Theoretical phase is to identify evidence base and appropriate theory to gather relevant information to find out the effective intervention packages for dengue prevention. Thus, the facts for the theoretical phase were identified from various sources, including existing evidence, expert opinion, and community need assessment. The modelling phase consists of modelling process and outcomes assessment. The model of the present study was the COMBI theory to empower the community to change the behaviour and ensure sustainable dengue control. The World Health Organization (WHO) 10 key steps in planning COMBI strategies were followed in order to develop the present intervention package,[1,9,10]. Accordingly, a Situational Market Analysis for Communication Keys (SMACK) was conducted in highest dengue endemic area in Kurunegala district (Kurunegala MOH area) to identify the Specific Behavioural Objectives (SBOO) for the plan. The SBOO were finalized using the results of the SMACK which was conducted using mixed methodological approach. Thereafter, the intervention package was finalized by modified Delphi method with expert opinion from specialists in public health from the National Dengue Control Unit (NDCU), Health Promotion Bureau (HPB), Provincial level, general medicine and consensus of the grass-root level experts and an advisor of the international COMBI institute. The developed plan was presented to the panel of expert and finalized the SBOO, strategies, activities for implementation of the intervention and monitoring of the intervention. The management team

prepared the scheduling, budget plan with the guidance of an economist, mobilization for resources and activity planning for the implementation of the developed intervention.

## **Results**

### **Theoretical phase**

There are different types of behavioural theories for health education, health promotion and behaviour change. Of them, Health Belief Model (HBM),[11,12], Seven Doors Model for Behaviour Change,[13,14], the Community Capacity Building Model for Sustainable Dengue Problem Solution (CCB-SDPS),[15-18], and Communication for Behavioural Impact (COMBI) planning,[1,9,19] were the widely used behavioural changed models for dengue prevention. After considering the effectiveness of the already conducted studies, planning abilities, implementation, and feasibility issues with the consensus of the expert panel, this intervention was formulated by using the COMBI theory. According to the literature review, the components of effective intervention packages were building partnership with multi-stakeholders; waste management at households; improving garbage collection; organization; entomological risk surveillance; capacity building at grass root level; stakeholder meetings and formulation of local steering committee; community working group formation and ensuring intra-sectoral coordination. The major factors associated with sustainable prevention of dengue are adequate knowledge of dengue and dengue prevention, positive attitudes towards the dengue prevention, adequate dengue prevention practices among the community members, adequate health seeking behaviour and high-risk perception on dengue, adequate dengue prevention behaviours, adequate community capacity for sustainable dengue prevention and adequate management of wet containers to prevent vector proliferation. The identified theories and components were used to develop the appropriate model. According to the studies, knowledge, attitudes, practices, health-seeking behaviours, and community

capacity are the major factors influencing the behaviour change. Therefore, those were considered as the main components for behaviour change to achieve a sustainable dengue prevention in the highly endemic area in the district.

## **The Modelling Phase**

### **Step one**

Overall goal was to decrease the morbidity and mortality due to dengue illness by improving the dengue prevention behaviours among the householders in highly endemic division in the district.

### **Step two**

Expected preliminary behavioural objectives were formulated prior to develop Specific Behavioural Objectives (SBOO).

### **Step three**

Current situational market analysis for communication keys was done using quantitative and qualitative methods. According to the quantitative analysis, mean knowledge on dengue prevention was 43.7% (SD 13.36; range 10 - 82). Of the participants, 57.7% (n=286) had good attitudes, 24.2% (n=120) had adequate dengue prevention practices, 44.6% (n=221) had good health seeking behaviours and 38.7% (n=74) had perceived that the community capacity is adequate for dengue prevention. Only 19% was knowledgeable on the importance of early notification of suspected cases and 19.2% (n=95) had adequate overall behaviours on dengue prevention. ‘Strengths, Weaknesses, Opportunities, Threats (SWOT)’ were assessed using qualitative method. The analysis of SWOT in relation to achieving the behavioural objectives are depicted in Table 1.

### **Table 1 SWOT analysis for dengue prevention behaviours**

|           |                      |                                                                                                                                                                                                                                                                                                                                                                                                                                                                                                                                                                                                                      |
|-----------|----------------------|----------------------------------------------------------------------------------------------------------------------------------------------------------------------------------------------------------------------------------------------------------------------------------------------------------------------------------------------------------------------------------------------------------------------------------------------------------------------------------------------------------------------------------------------------------------------------------------------------------------------|
| <b>1.</b> | <b>Strengths</b>     | Guidelines, monitoring and technical support from the National level (National Dengue Control Unit-NDCU)<br>Well established preventive sector with dedicated team for management<br>House to house inspection by Dengue Field Assistants at field level<br>School/Workplace dengue promotion activities<br>Support from other stakeholders<br>Availability of fogging facilities and case by case fogging activities                                                                                                                                                                                                |
| <b>2.</b> | <b>Weaknesses</b>    | Delays in notification<br>Poor health seeking behaviours<br>Gaps in law enforcement<br>Lack of community participation<br>Not considered as a priority area prior to monsoonal period (lack in preparedness)<br>Poor attitudes of the community members<br>Improper urbanization<br>No proper monitoring and evaluation mechanism for dengue management activities<br>Poor waste management and no established waste management system<br>Lands without proper ownership<br>Gaps in national policies and legislations related to vector control<br>Inadequate financial allocation for dengue prevention activities |
| <b>3.</b> | <b>Opportunities</b> | Availability of Dengue Field Assistants at field level<br>Availability of fogging facilities<br>Waste collection by local government authorities<br>Dengue committee meetings at all levels (divisional level, district level and National level) with multi-stakeholder participation<br>National and regional level policies to prevent dengue<br>Opportunities and grants for research activities                                                                                                                                                                                                                 |
| <b>4.</b> | <b>Threats</b>       | Political pressure for law enforcement<br>Increase in natural disasters which deviate the attention from dengue prevention to the disaster response activities                                                                                                                                                                                                                                                                                                                                                                                                                                                       |

180

181 Consumer need, cost, convenience analysis revealed that the majority (80%) is more benefit  
182 than the cost. Moreover, the people can earn extra money from manufacturing compost and  
183 home gardening using compost. Time taken for dengue activities is more beneficial than  
184 disease management. When considering the risk perception on dengue, it was very low and  
185 one-fourth of them perceived that it is not a deadly disease, and they believe so if their family



is not affected by dengue. Moreover, when considering competitors, there were no alternative behaviours or services being offered for this community. But the priority is shifted to control other outbreak situations such as leishmaniasis control activities in the area. The preferred methods of communication among the community were group discussions (43.4%), awareness through telephones (17.3%), displaying of notices or handbills (15.7%), other modes like street drama (12%) and one to one communication (11.5%).

#### **Step four**

The Specific Behavioural Objectives (SBOO) were to adopt proper waste management practices according to 3R method (Reduce, Reuse and Re-cycling) among the householders to reduce vector density and to improve the regular weekly dengue prevention practices by allocating at least one day a week to practice 30 minutes of cleaning to improve dengue prevention behaviours. Branding the theme was planned to distribute among the participants of the workshops [Supplementary file 1].

#### **Step five**

The main strategy was to conduct a community empowerment programme to improve household waste management and weekly practices on dengue prevention by conducting ‘The administrative mobilization and public relationship, public relations, public advocacy, community mobilization, personal selling, advertising and promotion, and point of service promotion during follow up. Table 2 shows the activities which were identified by the developed COMBI based intervention.

**Table 2. Activities to achieve targeted objectives to prevent dengue**

|           |                                                                                                                                                                                                                        |
|-----------|------------------------------------------------------------------------------------------------------------------------------------------------------------------------------------------------------------------------|
| <b>1.</b> | <b>Administrative mobilization and public relations</b>                                                                                                                                                                |
|           | <ul style="list-style-type: none"> <li>To formulate a training manual of ‘COMBI based community empowering for sustainable dengue control’ for field officers with the support of public health specialists</li> </ul> |

|           |                                                                                                                                                                                                                                                                                                                                                                             |
|-----------|-----------------------------------------------------------------------------------------------------------------------------------------------------------------------------------------------------------------------------------------------------------------------------------------------------------------------------------------------------------------------------|
|           | <ul style="list-style-type: none"> <li>• To conduct consultative meetings and Key Informant Interviews (KII) with health and non-health stakeholders to assess the need for dengue prevention in the area</li> <li>• To discuss with the heads of healthcare institutions on how to prepare an action plan for dengue management for the healthcare institutions</li> </ul> |
| <b>2.</b> | <b>Public Advocacy</b>                                                                                                                                                                                                                                                                                                                                                      |
|           | <ul style="list-style-type: none"> <li>• To conduct advocacy programmes to motivate the officials of local government authority (“Pradeshiya Sabha”) of the area, religious leaders, and the community leaders to get the support for waste management</li> </ul>                                                                                                           |
| <b>3.</b> | <b>Community Mobilization</b>                                                                                                                                                                                                                                                                                                                                               |
|           | <ul style="list-style-type: none"> <li>• To identify volunteer leaders for the sustainability of the dengue prevention</li> <li>• To train the leader group to conduct Training of Trainers (TOT) programme</li> </ul>                                                                                                                                                      |
| <b>4.</b> | <b>Personal Selling, Advertising and Promotion</b>                                                                                                                                                                                                                                                                                                                          |
|           | <ul style="list-style-type: none"> <li>• To select non-leader group and leader groups among the community</li> <li>• To conduct training workshops for non-leader community participants with interactive discussion</li> <li>• To brand the theme with the material</li> </ul>                                                                                             |
| <b>5.</b> | <b>Point of service Promotion during follow up</b>                                                                                                                                                                                                                                                                                                                          |
|           | <ul style="list-style-type: none"> <li>• To conduct weekly follow ups using a ‘Weekly follow up observation record’ in all three languages for four weeks</li> </ul>                                                                                                                                                                                                        |

207

208 Two-day workshops were planned to conduct for 25-30 participants per workshop. Day one  
 209 [Session I] was a motivation and the awareness on dengue prevention, which was planned to  
 210 conduct by the district Health Promotion Officer (HPO). Educational presentation on  
 211 awareness on dengue and consequences of dengue disease, identification of dengue vectors  
 212 and vector control strategies and the importance of at least 30 minutes premises inspection  
 213 per week, waste management according to 3R concept, and interactive lecture on composting  
 214 and organic farming were conducted during the session. Session II was a skill improvement

session of two sub-components. Demonstration of composting, organic farming and interactive discussion session using an information guide with the participants and a session including constructive discussion with having feedback of peers and trainer through analyzing the problems of the workshop for the participants were planned to conduct as the component of session two. Day-two also has two sessions. A household inspection and entomology survey are planned to conduct by trained entomological assistants. During session II, practical demonstration of composting lead by the community leader group and community base small group discussion at the households to identify the practical problems. Thereafter, theoretical problems were planned to address.

#### **Step six**

The finalized plan was presented to the stakeholders to get their feedback prior to finalizing the intervention plan.

#### **Step seven**

The management team was consisted of the first author and public health specialists. The technical advisory group was consisted of public health specialists with the collaboration of Regional Director of Health services (RDHS), district HPO, and Provincial vector control officer, Medical Officer of Health (MOH) and, public health inspectors. The collaborating agencies were Ministry of Health, RDHS office, MOH office, Agriculture department and District secretariat, Kurunegala, Sri Lanka.

#### **Step eight: Monitoring and Evaluation**

Monitoring and evaluation were planned to conduct after the community empowerment program according to their needs. It was planned to follow up weekly for one month the research team following the implementation sessions. The follow up is mainly focused on personal selling and supplemented by the counselling after assessing their compliance. The desired behavioural objectives are planned to repeat weekly for four weeks, and post-

intervention evaluation is planned to carry out after three months of completion of the intervention program. Weekly observational record was designed to document [Supplementary file 2].

### **Step nine: Impact Assessment**

A pilot study was planned to conduct to assess the feasibility issues and outcomes of interest including changes in knowledge, attitudes, vector control practices, dengue prevention behaviour and community capacity. Entomological surveys were planned to carry out to assess the impact on vector densities. The behavioural impact was planned to assess by observations of management of waste according to 3R concept, outdoor, indoor water containers, water storages and roof gutter at the household level during the implementation of the finalized plan. After piloting the developed intervention package, a cluster randomized trial was planned to conduct to assess the effectiveness of the complex intervention package.

### **Step ten: Scheduling and Budget**

The action plan was developed after taking expert opinion from the panel of expert.

### **Discussion**

The complex intervention was formulated according to the revised framework of complex intervention development. The rationale for a complex intervention is to develop a theoretical understanding of the likely process of change, by drawing on existing evidence and theory, supplemented, if necessary, by new primary research, qualitative approach with the stakeholders or the targeted population,[4]. In addition, there may be lots of competing or partly overlapping theories,[20]. However, the research team need expertise opinion on relevant disciplines to find the most appropriate theory and as the complex interventions have several dimensions of complexity, it may be to do with the range of possible outcomes, or their variability in the target population, rather than with the number of elements in the intervention package itself. It follows that there is no sharp boundary between simple and

265 complex interventions, [4]. The interventions have been developed according to different  
 266 models and planning processes. The planning of the intervention package was formulated  
 267 using WHO's 10 steps of COMBI planning method. The COMBI approach is successfully  
 268 demonstrated that correct problem identification synergized with community engagement can  
 269 potentially reduce Aedes proliferation and dengue morbidity in Malaysia and Sri  
 270 Lanka,[21,22]. Out of the COMBI based interventions, Malaysia used integrated marketing  
 271 communication techniques to inoculate this behavioral change to target group. Therefore, the  
 272 COMBI approach is successful with correct problem identification and community  
 273 engagement,[21]. The use of the Delphi technique instead of face-to-face consultative  
 274 meetings had the advantage of not requiring the experts to take time off their schedules to  
 275 contribute to the study. It allow the experts to respond at any time convenient to them and to  
 276 contact any source of information if needed. Further, this process facilitated the independence  
 277 of forming opinion and perspectives as it prevented the manipulation of opinion by influential  
 278 individuals, which could happen in a face-to-face consultative meeting,[23]. In the process of  
 279 development of the intervention plan, there was a quantitative study to finalize the SBOs. For  
 280 that, validated tools were used to assess the current situation marketing analysis as a major  
 281 step in the COMBI planning process. The generalizability of an intervention package depends  
 282 on the effectiveness and validity of models, theories, methods use for development process.  
 283 In the present study, after considering the effectiveness of the already conducted studies,  
 284 planning abilities, implementation, and feasibility issues with the consensus of the expert  
 285 panel, COMBI planning was identified for the development of the interventional package.  
 286 Importantly, the COMBI theory was used to plan the process of community empowerment  
 287 program, because it is a proven effective method for behavior changes for dengue control and  
 288 widely utilizing planning process in different countries,[19]. Moreover, the process of  
 289 assessing current situation market analysis also performed by mixed methodology with

representative samples. Therefore, the generalizability of the intervention to high endemic areas could be done with adaptation to setting. Notably, incorporation of similar programs for prevention of dengue through behavioural change to the public health system of Sri Lanka seems feasible and cost effective,[22]. Moreover, a community-based dengue prevention and control process enables key stakeholders in the community to actively prevent and control their dengue problem, [18]. Importantly, the studies in the Dominican Republic,[24], Colombia,[25], Hulu Langat,[21] and Thailand,[18] revealed that the interpersonal communication was an effective way to achieve greater success of a community-based programme. Therefore, the present intervention package aimed to empower the community by developing a sustainable dengue control process at the grass root level with the involvement of multi-stakeholders. Importantly, the dengue problem can be solved by conducting the community-based dengue prevention process with active participation of key stakeholders in the community. Moreover, sustainability of a community-based dengue prevention and control comprise activities depends on the degree of eliminate larval breeding sources, control adult mosquitoes, apply personal protection, introduce dengue symptom detection, and outbreak prevention, [26]. In Sri Lanka also there is a clear need to address above areas especially waste management and vector control,[22]. Importantly, the specificity of the intervention messages of the present study was waste management according to 3R concept aiming source reduction from both outdoor and indoor vector breeding places. Formalization of waste management would empower the community members to identify breeding sites and removing them. It would not that difficult or not labour intensive or less costly than managing dengue cases or mass cleaning campaigns. Such specific messages have been used to achieve successful behavioural outcomes in the interventions in other countries, [21,22,25,27,28]. Solid waste management is a growing challenge to many countries. Improper waste management serve as the breeding places for

many vectors resulting in proliferation of vector-borne diseases,[29]. Moreover, the presence of solid waste around households, such as cans, car parts, bottles, old and used tyres, plastic materials, broken clay, glass vessels and coconut shells, created outdoor breeding sites for Aedes mosquitoes and represented in our ecosystem the most productive container types. Maintaining solid waste for a long time often more than seven days supports the breeding of Aedes aegypti,[30] and increases the transmission of dengue. Moreover, Wijesundara planned the intervention according to COMBI with two SBOs including 30 minutes' inspection on Sunday and improve the proper waste management practices and Rozhan and others have identified the SBOs as management of water containers twice weekly and scrub any containers found to contain larvae. Furthermore, a study was carried out in Malaysia revealed that the knowledge, attitudes and practices were influenced by the interventional programme during its implementation weeks. However, the outcome evaluations at the end of the study revealed that COMBI programme failed to achieve the desired behavioral impact of the programme. The multi-stakeholder collaboration is one of the suggested solutions to overcome the problems of the programme, because there was lack of human resources and funding. Furthermore, they suggested to improve the health sector participation for the awareness of the community to prevent dengue,[31]. Therefore, for the development of the present intervention package, the multi-stakeholder participation was ensured. Similar to the present study, community empowerment programs were conducted in Cuba,[32,33] and Myanmar,[28]. Moreover, Behaviour change intervention package was developed to manage household water container in Philippine, 2012. Further, this study revealed that other factors such as social and political environment are needed to explain community responses to new dengue vector control interventions,[27]. Therefore, the present study was developed using new communication strategy with multi-stakeholder participation. Another study conducted in Cuba revealed that the importance of the community-based strategies such as

organizational management, entomological risk surveillance, capacity building and community work for vector control. The community empowerment strategy increased community involvement and added effectiveness to routine *A. aegypti* control,[33]. The efficacy of community-controlled partnership-driven interventions was found to be superior to the vertical approach in terms of sustainability and community empowerment. Moreover, a study in Sri Lanka, revealed that the vector control interventions had a significant impact on vector densities (BI) and on dengue incidence. It revealed that rigorous vector control programs lead to reduce the disease and economic burden of dengue in endemic settings,[34] al, 2019). When considering the intervention packages in the studies, there was a lack of scientific evidence in the development process. Therefore, to develop the present intervention package, the evidence from most of the effective intervention packages were utilized. Not only that, but the identified gaps of the failed interventions were also considered to have better outcomes of interest. Therefore, the present intervention package can be considered as a scientifically developed intervention for sustainable dengue prevention.

### **Conclusion and Recommendations**

Developing a COMBI plan for an area after the identification of specific behavioural objectives would make it feasible for implementation in order to empower the community to prevent dengue in the area and to improve community health services. Scientifically developed COMBI based planning process can be used to bring about satisfactory control of dengue with the participation of the community in high endemic areas to achieve sustainable dengue prevention. This type of intervention can be applied to any locality after conducting the situation marketing analysis of the relevant area and developing area specific COMBI plan with the support of the preventive sector healthcare institutions in any country. Moreover, future research can be conducted using the COMBI planning process in the other endemic areas in preventing dengue outbreaks in the region or globally.



## Author contributions

Conceptualization and methodology: RMNUR, CA, AB; Technical advisors: NP, AA; Writing and Original draft preparation: RMNUR; Review, editing and supervision: CA, AB, NP, AA, SM.

## Footnote

Conflicts of Interest: The authors declare no conflict of interest.  
Funding: This research did not receive any specific grant from funding agencies for publication.  
Institutional Review Board Statement: Ethical clearance was obtained from the ERC, Faculty of Medicine, University of Colombo, Sri Lanka (EC/18/134).

## Acknowledgements

- Provincial Directors of North-Western Province (NWP), Regional Directors of Kurunegala District, Consultant Community Physician, NWP, MOH Kurunegala, Public health team including Public health inspectors, dengue field assistance and all participants.
- Professor Everold Husein (Senior Communication Advisor-Consultant, Adjunct Professor, President-The COMBI Institute).

## References

1. Parks, W., & Lloyd, L. *Planning social mobilization and communication for dengue fever prevention and control: A step-by-step guide*. WHO, 138. 2004. <http://doi.org/78/1/70> [pii]
2. Craig P., Dieppe P., Macintyre S., Michie S., Nazareth I., & Petticrew M. *Developing and evaluating complex interventions: The new Medical Research Council guidance*. BMJ 2008; 337 :a1655. <https://doi.org/10.1136/bmj.a1655>
3. Möhler, R., Köpke, S., & Meyer, G. Criteria for Reporting the Development and Evaluation of Complex Interventions in healthcare: revised guideline (CReDECI 2). *Trials*, 2015. 16, 204. <https://doi.org/10.1186/s13063-015-0709-y>
4. Craig P., Dieppe P., Macintyre S., Michie S., Nazareth I., & Petticrew M. Developing and evaluating complex interventions: New Guidance. *The new Medical Research*

- 395 Council (MRC). 2019. [https://mrc.ukri.org/documents/pdf/complex-interventions-](https://mrc.ukri.org/documents/pdf/complex-interventions-guidance/)  
396 guidance/
- 397 5. WHO. (2012). COMMUNICATION FOR BEHAVIOURAL IMPACT (COMBI): A  
398 *toolkit for behavioural and social communication in outbreak response* . Retrieved  
399 December 2017.  
400 [http://apps.who.int/iris/bitstream/10665/75170/1/WHO\\_HSE\\_GCR\\_2012.13\\_eng.pdf?u](http://apps.who.int/iris/bitstream/10665/75170/1/WHO_HSE_GCR_2012.13_eng.pdf?ua=1)  
401 [a=1](http://apps.who.int/iris/bitstream/10665/75170/1/WHO_HSE_GCR_2012.13_eng.pdf?ua=1).
- 402 6. Alvarado-Castro, V., Paredes-Solís, S., Nava-Aguilera, E., Morales-Pérez, A., Alarcón-  
403 Morales, L., Balderas-Vargas, N. A., & Andersson, N. Assessing the effects of  
404 interventions for Aedes aegypti control: systematic review and meta-analysis of cluster  
405 randomised controlled trials. BMC public health,2017. 17(Suppl 1), 384.  
406 <https://doi.org/10.1186/s12889-017-4290-z>
- 407 7. Aya Pastrana, N., Lazo-Porras, M., Miranda, J. J., Beran, D., & Suggs, L. S. Social  
408 marketing interventions for the prevention and control of neglected tropical diseases: A  
409 systematic review. *PLoS neglected tropical diseases*, 2020. 14(6), e0008360.  
410 <https://doi.org/10.1371/journal.pntd.0008360>
- 411 8. WHO. *Dengue: Guidelines for Diagnosis, Treatment, Prevention and Control: New*  
412 *Edition*. (World Health Organization and the Special Programme for Research and  
413 Training in Tropical Diseases (TDR). 2009.  
414 <https://www.ncbi.nlm.nih.gov/books/NBK143158/>: ISBN 978 92 4 154787 1
- 415 9. WHO, UNICEF, & FAO. Communication for Behavioural Impact (Combi).  
416 *Communication for Behavioural Impact (Combi)*,2012. 3–14.  
417 <http://doi.org/WHO/HSE/GCR/2012.13>
- 418 10. Health Education Bureau [HEB]. Communiication for Behavioural Impact (COMBI).  
419 *MD presentation*. 2017. PGIM: University of Colombo.
- 420 11. Lennon, J.L. *The Use of the Health Belief Model in Dengue Health Education*. 2005.  
421 [https://apps.who.int/iris/bitstream/handle/10665/164117/dbv29p217.pdf;jsessionid=7](https://apps.who.int/iris/bitstream/handle/10665/164117/dbv29p217.pdf;jsessionid=7EA0BB4A8F0C787860045F1F2E1DF826?sequence=1)  
422 [EA0BB4A8F0C787860045F1F2E1DF826?sequence=1](https://apps.who.int/iris/bitstream/handle/10665/164117/dbv29p217.pdf;jsessionid=7EA0BB4A8F0C787860045F1F2E1DF826?sequence=1).
- 423 12. Thompson F. & Caltabiano M.L. The Health Belief Model and dengue fever preventative  
424 behaviours: A pilot programme. *International Journal of Health Promotion and*  
425 *Education*;2013. 48: 1-2010  
426 [https://www.tandfonline.com/doi/abs/10.1080/14635240.2010.10708175?journalCode=](https://www.tandfonline.com/doi/abs/10.1080/14635240.2010.10708175?journalCode=rhpe20)  
427 [rhpe20](https://www.tandfonline.com/doi/abs/10.1080/14635240.2010.10708175?journalCode=rhpe20)
- 428 13. Robinson L. *The voluntary adoption of new practices*. 2006.  
429 [http://enablingchange.com.au/Voluntary\\_change.pdf](http://enablingchange.com.au/Voluntary_change.pdf).
- 430 14. Robinson L. *Introduction to the 7 Doors model*. 2007.  
431 [http://enablingchange.com.au/7\\_doors\\_page.html](http://enablingchange.com.au/7_doors_page.html).
- 432 15. Suwanbamrung C, Somrongthong R, Singchanchai P, Srigernyuang L. The development  
433 of a tool to assess community capacity of sustainable community-based dengue  
434 prevention and control: a study in Southern Thailand. Thesis (Ph.D). 2008. Bangkok,  
435 Thailand: Chulalongkorn University.  
436 <https://cuir.car.chula.ac.th/xmlui/handle/123456789/56075>
- 437 16. Suwanbamrung C, Somrongthong R, Singchagchai P, Srigernyaung L. Application of a

- 438 Dengue Community Capacity Assessment Tool (DCCAT) for sustainable community-  
439 based dengue prevention and control. In: *Boonmongkon P, Samakekarom R. Proceeding*  
440 *of the 1st Annual International Graduate Research Conference on social sciences and*  
441 *humanities*. Bangkok, Thailand; 2009, p, 204-213.  
442 [http://citeseerx.ist.psu.edu/viewdoc/download?doi=10.1.1.454.7359&rep=rep1&type=p](http://citeseerx.ist.psu.edu/viewdoc/download?doi=10.1.1.454.7359&rep=rep1&type=pdf)  
443 [df](http://citeseerx.ist.psu.edu/viewdoc/download?doi=10.1.1.454.7359&rep=rep1&type=pdf)
- 444 17. Suwanbamrung C, Nukan N, Sripon S, Somrongthong R, Singchagchai P. Community  
445 capacity for sustainable community-based dengue prevention and control: Study of a  
446 Sub-district in Southern Thailand. *Asian Pac J Trop Med* ; 2010. 3(4): 1-5.  
447 <https://www.sciencedirect.com/science/article/pii/S1995764510600120>
- 448 18. Suwanbamrung C, Tapalak N, Jitchun C., Promsuwan C, Prosupa S, Muenraj Y, Dumpan  
449 A. *Student capacity building of dengue prevention and control: A study of an Islamic*  
450 *school, Southern Thailand*. 2012.  
451 <https://www.scirp.org/Journal/PaperInformation.aspx?PaperID=21179>.
- 452 19. THE COMBI INSTITUTE. *Basics of Communication for Behavioral Impact*. (2018-  
453 2019). <http://www.combiinstitute.org/combi-basics.html>.
- 454 20. Noar, S. M., & Zimmerman, R. S. Health Behavior Theory and cumulative knowledge  
455 regarding health behaviors: are we moving in the right direction?. *Health education*  
456 *research*, 2005. 20(3), 275–290. <https://doi.org/10.1093/her/cyg113>
- 457 21. Rozhan S, Jamsiah M, Rahimah A, Ang KT. The COMBI (communication for  
458 behavioural impact) program in the prevention and control of dengue—the Hulu Langat  
459 experience. 2006.  
460 [https://www.researchgate.net/publication/228451818\\_The\\_COMBI\\_communication\\_for](https://www.researchgate.net/publication/228451818_The_COMBI_communication_for_behavioural_impact_program_in_the_prevention_and_control_of_dengue-the_Hulu_Langat_experience)  
461 [\\_behavioural\\_impact\\_program\\_in\\_the\\_prevention\\_and\\_control\\_of\\_dengue-](https://www.researchgate.net/publication/228451818_The_COMBI_communication_for_behavioural_impact_program_in_the_prevention_and_control_of_dengue-the_Hulu_Langat_experience)  
462 [the\\_Hulu\\_Langat\\_experience](https://www.researchgate.net/publication/228451818_The_COMBI_communication_for_behavioural_impact_program_in_the_prevention_and_control_of_dengue-the_Hulu_Langat_experience)
- 463 22. Wijesundara, B. S. *Evaluation of the effectiveness of a behavioural intervention on*  
464 *dengue prevention for householders living in the Colombo Municipal Council area*.  
465 2009. Colombo: PGIM library University of Colombo: MD thesis, D:02168
- 466 23. Hsu, C., & Sandford, B. The Delphi Technique: Making Sense of Consensus. *Practical*  
467 *Assessment, Research and Evaluation*, 2007. 12, 10.
- 468 24. Leontsini E, Gil E, Kendall C & Clark GG. Effect of a community-based *Aedes aegypti*  
469 control programme on mosquito larval production sites in El Progreso, Honduras. *Trans*  
470 *R Soc Trop Med Hyg*; 1993. 87:267.  
471 <https://www.sciencedirect.com/science/article/abs/pii/003592039390120F>
- 472 25. Luna E. J., Chain I., Hernandez J., Clark G. C., Bueno A., Escalante R., Angarita S.,  
473 Martinez A. Social Mobilization Using Strategies of Education and Communication  
474 to Prevent Dengue Fever in Bucaramanga, Colombia. 2004. WHO Regional Office  
475 for South-East Asia. <https://apps.who.int/iris/handle/10665/164011>
- 476 26. WHO. Prevention and control of dengue and den- gue hemorrhagic fever:  
477 Comprehensive guidelines. 1999. WHO Regional Publication, New Delhi.
- 478 27. Espino, F., Marco, J., Salazar, N. P., Salazar, F., Mendoza, Y., & Velazco, A.  
479 Community-based dengue vector control: experiences in behavior change in

480 Metropolitan Manila, Philippines. *Pathogens and global health*, 2012. 106(8), 455–  
481 461. <https://doi.org/10.1179/2047773212Y.0000000061>

482 28. Wai, K. T., Htun, P. T., Oo, T., Myint, H., Lin, Z., Kroeger, A., ... Petzold, M.  
483 Community-centred eco-bio-social approach to control dengue vectors: an intervention  
484 study from Myanmar. *Pathogens and Global Health*, 2012. 106(8), 461–468.  
485 <http://doi.org/10.1179/2047773212Y.0000000057>

486 29. Tohit N.F.M, Hassan N.A., Rus R.M. & Aidid E.M. SOLID WASTE: ITS  
487 IMPLICATION FOR HEALTH AND RISK OF VECTOR BORNE DISEASES. 2019.  
488 [https://www.researchgate.net/publication/338356857\\_SOLID\\_WASTE\\_ITS\\_IMPLICA](https://www.researchgate.net/publication/338356857_SOLID_WASTE_ITS_IMPLICA)  
489 [TION\\_FOR\\_HEALTH\\_AND\\_RISK\\_OF\\_VECTOR\\_BORNE\\_DISEASES/citations](https://www.researchgate.net/publication/338356857_SOLID_WASTE_ITS_IMPLICA_TION_FOR_HEALTH_AND_RISK_OF_VECTOR_BORNE_DISEASES/citations)

490 30. Alpana B. & Haja A. Application of GIS in Modeling Dengue Risk Based on  
491 Sociocultural Data: Case of Jalore, Rajasthan, India.. WHO Regional Office for South-  
492 East Asia. 2001. <https://apps.who.int/iris/handle/10665/163690>

493 31. Azmawati, M. N., Aniza, I., & Ali, M. Evaluation of Communication for Behavioral  
494 Impact (COMBI) Program in Dengue Prevention: A Qualitative and Quantitative Study  
495 in Selangor, Malaysia. *Iranian journal of public health*, 2013. 42(5), 538–539.  
496 <https://www.ncbi.nlm.nih.gov/pmc/articles/PMC3684465/>

497 32. Vanlerberghe V., Toledo M.E., Rodríguez M., Gomez D., Baly A., Benitez J.R., Stuyft V.  
498 D. *Community involvement in dengue vector control: cluster randomised trial*. 2009.  
499 <https://doi.org/10.1136/bmj.b1959>

500 33. Castro-Rodriguez R, Galera-Gelvez K, López-Yescas JG, Rueda-Gallardo JA. *Costs of*  
501 *dengue to the health system and individuals in Colombia from 2010 to 2012. Am J Trop*  
502 *Med Hyg*. 2015. 92(4). doi: 10.4269/ajtmh.14-0386. Epub 2015 Feb 9.

503 34. Liyanage P., Rocklöv J., Tissera H., Palihawadana P., Wilder-Smith A. & YesimTozan  
504 Y. *Evaluation of intensified dengue control measures with interrupted time series*  
505 *analysis in the Panadura Medical Officer of Health division in Sri Lanka: a case study*  
506 *and cost-effectiveness analysis*. 2019.  
507 <https://www.sciencedirect.com/science/article/pii/S2542519619300579>

508
