# Supplementary material for: DEVELOPMENT OF A COMPLEX INTERVENTION PACKAGE FOR DENGUE PREVENTION
Source: bioRxiv or medRxiv preprint supplement (doi:10.1101/2022.06.16.22274559), 2022-09-22
Supplement: Supplementary file [file media-1.pdf]

**Theme of the Behavioral Change:**

**Waste Management**

**According to**

**3R - Concept**

**(R-REDUCE, R-REUSE, R-RECYCLE)**

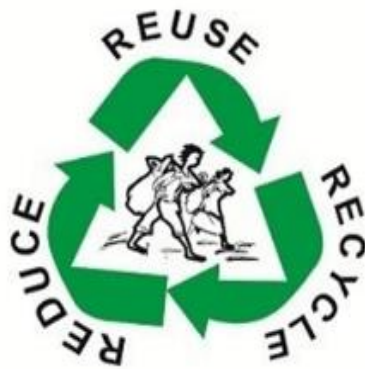

**Clean Your Premises**

**At least 30 minutes Per a Week**

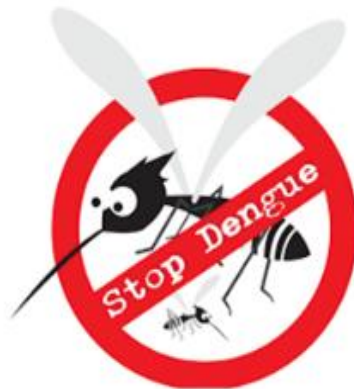

**Let's Have a Dengue Free Environment**
