# Supplementary material for: DEVELOPMENT OF A COMPLEX INTERVENTION PACKAGE FOR DENGUE PREVENTION
Source: bioRxiv or medRxiv preprint supplement (doi:10.1101/2022.06.16.22274559), 2022-09-22
Supplement: Supplementary file [file media-2.pdf]

The Weekly Record for Observation of Dengue Mosquito Breeding Places

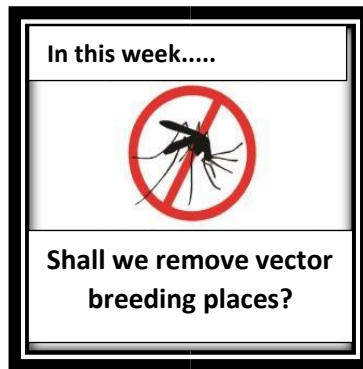

Your honest response is greatly appreciated!!!!

If you perform it mark a  in the relevant day...

| Month | Week | Monday | Tuesday | Wednesday | Thursday | Friday | Saturday | Sunday |
|-------|------|--------|---------|-----------|----------|--------|----------|--------|
| 1     | 1    |        |         |           |          |        |          |        |
|       | 2    |        |         |           |          |        |          |        |
|       | 3    |        |         |           |          |        |          |        |
|       | 4    |        |         |           |          |        |          |        |
|       |      |        |         |           |          |        |          |        |
| 2     | 1    |        |         |           |          |        |          |        |
|       | 2    |        |         |           |          |        |          |        |
|       | 3    |        |         |           |          |        |          |        |
|       | 4    |        |         |           |          |        |          |        |
|       |      |        |         |           |          |        |          |        |
| 3     | 1    |        |         |           |          |        |          |        |
|       | 2    |        |         |           |          |        |          |        |
|       | 3    |        |         |           |          |        |          |        |
|       | 4    |        |         |           |          |        |          |        |

Remarks: (If any)

.....

.....

.....

Please keep this form safely and handover to the dengue research team members who visited to your place. Your regular good practice will save a life

[For Further clarification; please do not hesitate to contact the principal investigator

Dr. Nayani Rajapaksha +94778974176]

|                                        |
|----------------------------------------|
| <i>For official use only PHI area:</i> |
| Cluster number:                        |
| Serial number of the household:        |
